# Eph receptors inactivate R-Ras through different mechanisms to achieve cell repulsion

Monique Dail<sup>1,2</sup>, Melanie Richter<sup>1</sup>, Pierre Godement<sup>3</sup> and Elena B. Pasquale<sup>1,2,\*</sup>

<sup>1</sup>The Burnham Institute, 10901 N. Torrey Pines Road, La Jolla, CA 92037, USA

<sup>2</sup>Pathology Department, University of California San Diego, La Jolla, CA 92093, USA

<sup>3</sup>Université René Descartes, Centre Biomédical des Saints-Pères, UMR7060 CNRS 75270 Paris CEDEX 06, France

\*Author for correspondence (e-mail: elenap@burnham.org)

Accepted 19 December 2005

Journal of Cell Science 119, 1244-1254 Published by The Company of Biologists 2006  
doi:10.1242/jcs.02842

## Summary

Eph receptor tyrosine kinases regulate the spatial organization of cells within tissues. Central to this function is their ability to modulate cell shape and movement in response to stimulation by the ephrin ligands. The EphB2 receptor was reported to inhibit cell-matrix adhesion by phosphorylating tyrosine 66 in the effector domain of R-Ras, a Ras family protein known to regulate cell adhesion and motility. Here, we further characterize the role of R-Ras downstream of both EphA and EphB receptors. Our data show that besides inhibiting R-Ras function through phosphorylation, Eph receptors can reduce R-Ras activity through the GTPase-activating protein, p120RasGAP. By using R-Ras mutants that cannot be inactivated by p120RasGAP and/or cannot be phosphorylated at tyrosine 66, we show that the two forms of R-Ras negative regulation – through increased GTP hydrolysis and

phosphorylation – differentially contribute to various ephrin-mediated responses. Retraction of the COS cell periphery depends only on R-Ras inactivation through p120RasGAP. By contrast, both reduced R-Ras GTP levels and tyrosine 66 phosphorylation contribute to the ephrin inhibitory effects on COS cell migration and to ephrin-dependent growth cone collapse in primary neurons. Therefore, Eph receptors can regulate R-Ras in two different ways to achieve cell repulsion.

Supplementary material available online at  
<http://jcs.biologists.org/cgi/content/full/119/7/1244/DC1>

Key words: Ephrin, GTPase-activating protein, P120RasGAP, Cell retraction, Cell motility, Growth cone collapse

## Introduction

The Eph receptor tyrosine kinases play important roles in both embryonic development and adult tissue homeostasis by regulating diverse biological functions, including the establishment of neuronal connectivity, modulation of synaptic plasticity, formation of tissue boundaries, and remodeling of vascular and lymphatic vessels (Palmer and Klein, 2003; Pasquale, 2005). In addition, recent evidence has linked Eph receptors to pathologic processes such as tumor growth and tumor angiogenesis (Brantley-Sieders et al., 2004) and to genetic mutations involving defects in tissue patterning that lead to skeletal malformations (Twigg et al., 2004; Wieland et al., 2004). The Eph receptors can initiate signals that result in cell repulsion, which involve reorganization of the actin cytoskeleton and changes in cell adhesion leading to retraction of cellular processes. For example, EphA receptor activation by ephrin ligands triggers the collapse of the enlarged tips (growth cones) of growing neuronal processes, while in the dendrites of mature hippocampal pyramidal neurons it causes retraction of the small protrusions – called dendritic spines – where excitatory synapses are located (Drescher et al., 1995; Murai et al., 2003; Pasquale, 2005). Additionally, the repulsive effects of Eph receptors restrict cell positioning in various tissues, such as the rhombomeres of the developing hindbrain, streams of migrating embryonic neural crest cells, and differentiating

epithelial cells in adult intestinal microvilli (Batlle et al., 2002; Poliakov et al., 2004).

The Eph receptors are grouped into two classes (EphA and EphB) that have binding preference for ephrin ligands of the corresponding A or B class (Pasquale, 2004). Both the glycosylphosphatidylinositol-anchored ephrin-A ligands and the transmembrane ephrin-B ligands are on the cell surface. Thus, the Eph receptors transduce signals as a result of direct cell-cell contact, which enables receptor-ligand interaction (Pasquale, 2005). Despite growing knowledge of Eph receptor signal transduction, very little is known regarding the similarities and differences in the signaling pathways downstream of the EphA and EphB receptors.

Several pathways downstream of Eph receptors have been implicated in regulation of the cytoskeleton, a majority of which converge on small GTPases of the Ras and Rho families (Murai and Pasquale, 2005; Noren and Pasquale, 2004). GTPases cycle between GTP-bound 'on' and GDP-bound 'off' conformations and are regulated by guanine nucleotide exchange factors, which activate Ras proteins by promoting the exchange GDP for GTP, and GTPase-activating proteins, which inactivate Ras proteins by stimulating GTP hydrolysis.

R-Ras is a member of the Ras family that positively affects integrin-mediated adhesion in diverse cell types and has been implicated in Eph receptor signaling pathways (Hughes et al., 2001; Keely et al., 1999; Kwong et al., 2003; Sethi et al., 1999;

Zhang et al., 1996; Zou et al., 1999). Although the signals promoting R-Ras activation remain elusive, active forms of R-Ras enhance cell adhesion and directed migration in non-neuronal cells and promote integrin-dependent neurite outgrowth in retinal, cortical and hippocampal neurons (Ivins et al., 2000; Keely et al., 1999; Kinbara et al., 2003; Zhang et al., 1996). Thus, repulsive molecules probably have to overcome R-Ras activity in cells where R-Ras is both present and activated. Negative regulation of R-Ras has been linked to inhibition of cell-substrate adhesion downstream of the EphB2 receptor overexpressed in 293 human embryonal kidney cells and NIH 3T3 fibroblasts (Zou et al., 1999). Interestingly, EphB2 was shown to regulate R-Ras activity by phosphorylating tyrosine 66 in the effector-binding domain, an unusual mode of regulation for a Ras GTPase. Furthermore, a R-Ras mutant that both cannot be phosphorylated and is constitutively GTP-bound overcomes the anti-adhesive effects of exogenously expressed EphB2 in 293 cells (Zou et al., 1999).

Several exchange factors for H-Ras and the Rap1 exchange factor, C3G, can activate R-Ras (Gotoh et al., 1997; Kinbara et al., 2003; Ohba et al., 2000), whereas several GTPase-activating proteins for H-Ras can promote GTP hydrolysis by R-Ras (Kinbara et al., 2003; Ohba et al., 2000). R-RasGAP and p120RasGAP exhibits preferential activity towards R-Ras, even though p120RasGAP is better known as a regulator of H-Ras (Li et al., 1997; Yamamoto et al., 1995). Furthermore, recent work has revealed that certain Plexins – which are receptors for the repulsive axon guidance molecules semaphorins – are GTPase-activating proteins with selective activity towards R-Ras (Oinuma et al., 2004a; Oinuma et al., 2004b). Significantly, semaphorin 4D was the first extracellular stimulus to be shown to influence the levels of R-RasGTP. Binding of semaphorin 4D to Plexin-B1 inhibits R-Ras activity, leading to COS cell rounding and growth cone collapse in hippocampal neurons. Furthermore, expression of active R-Ras prevents growth cone collapse induced by semaphorin 4D-Plexin-B1 as well as semaphorin 3A-Plexin-A1, whereas R-Ras siRNA has been reported to cause morphological changes in growth cones similar to those induced by collapse (Oinuma et al., 2004a). These findings support the idea that repulsive molecules in the nervous system modulate growth cone dynamics at least in part by regulating R-Ras activity.

Here we investigate whether the Eph receptors can also down regulate R-RasGTP levels, in addition to inactivating R-Ras through phosphorylation, and whether this form of R-Ras regulation plays a role in the repulsive effects of Eph receptors. We used COS cells, an established model system to study repulsive signaling (Oinuma et al., 2004b; Rohm et al., 2000; Takahashi et al., 1999), and primary hippocampal and retinal neurons, in which R-Ras is known to play a role in neurite outgrowth and growth cone collapse (Ivins et al., 2000; Oinuma et al., 2004a). Both COS cells and hippocampal neurons express endogenous EphA and EphB receptors as well as R-Ras and exhibit repulsive responses following stimulation with the appropriate ephrins. We found that both EphA and EphB receptors can inhibit R-Ras through p120RasGAP as well as through tyrosine phosphorylation. Interestingly, these two modes of R-Ras regulation appear to contribute differently to COS cell retraction and rounding, COS cell haptotactic migration towards fibronectin and growth cone collapse in primary neuronal cultures.

## Results

### Ephrin-dependent activation of the EphA2 and EphB2 receptors induces COS cell retraction and rounding

Soluble forms of the ephrin ligands fused to the Fc portion of human IgG1 can be used to activate Eph receptor signaling. Stimulation of COS cells with either ephrin-A1 Fc or ephrin-B1 Fc (which promiscuously activate multiple EphA or EphB receptors, respectively) revealed that these cells undergo dramatic morphological changes in response to either ephrin. These changes begin with retraction of the cell periphery and the appearance of actin-rich retraction fibers within 5 to 10 minutes, as shown by time-lapse microscopy (Fig. 1A) and phalloidin staining (Fig. 1B). By 30 to 45 minutes the cells occupy a much smaller area and have become rounded. The COS cell retraction and rounding probably involve both RhoA-dependent contraction of the actin cytoskeleton and decreased cell-substrate adhesion (Kaibuchi et al., 1999; Noren and Pasquale, 2004). Indeed, we found that treatment of cells with Y-27632 (an inhibitor of the RhoA-Rho kinase pathway) or with manganese [which activates several integrins (Bazzoni et al., 1995; Ivins et al., 2000)] prevents the morphological effects of both ephrin-A1 and ephrin-B1 (see supplementary material Figs S1 and S2).

EphB2 is present in COS cells and becomes phosphorylated on tyrosine residues in response to ephrin-B1 stimulation (Fig. 1C). In addition, we recently demonstrated that a peptide that selectively antagonizes ephrin binding to EphB2 and not other EphB receptors abrogates ephrin-B1-induced COS cell retraction (Koolpe et al., 2005). Therefore, the EphB receptor that mediates the repulsive effects of ephrin-B1 is EphB2. Among the EphA receptors, EphA2 is highly expressed in COS cells and becomes phosphorylated on tyrosine residues in response to ephrin-A1 stimulation (Fig. 1C,D). To determine whether EphA2 activation is sufficient to induce cell retraction, we treated COS cells with the YSA ephrin-mimic peptide (YSAYPDSVPMMS), which selectively activates EphA2 and not other EphA receptors (Koolpe et al., 2002). The YSA peptide, but not a control peptide, induces cell retraction concomitant with EphA2 tyrosine phosphorylation (Fig. 1D-F). This result identifies EphA2 as an EphA receptor that causes COS cell retraction. However, we cannot exclude that other EphA receptors may also contribute to the effects of ephrin-A1. We detected EphA4 in COS cells, but at very low levels (data not shown), indicating that the role of EphA4 is probably small.

### GTP-bound R-Ras inhibits ephrin-induced COS cell retraction

Given the known ability of activated R-Ras to regulate adhesion and counteract certain effects of repulsive molecules (Oinuma et al., 2004a; Zou et al., 1999), we examined whether R-Ras can inhibit ephrin-induced COS cell retraction. We focused on the earlier stages of the response, when retraction fibers are readily detectable, because at later stages some of the rounded cells may detach making analysis less reliable. We found that COS cells transfected with wild-type R-Ras undergo retraction of the cell periphery upon ephrin treatment, similarly to control-transfected cells (Fig. 2A,C). We then transfected the R-Ras38VY66F mutant, which is constitutively active because it can neither hydrolyze GTP nor become phosphorylated on tyrosine 66 (Zou et al., 1999). R-Ras38VY66F-transfected

**Fig. 1.** Ephrin stimulation induces retraction and rounding of COS cells. (A) Still images from time-lapse movies of COS cells stimulated with ephrin-A1 Fc or ephrin-B1 Fc. (B) Photographs of cells stimulated with ephrin-A1 Fc or ephrin-B1 Fc for the indicated times (in minutes), or with Fc for 45 minutes as a control, and stained with rhodamine-phalloidin to label filamentous actin. (C) Endogenous EphA2 and EphB2 receptors become tyrosine-phosphorylated in COS cells stimulated with ephrin-A1 Fc or ephrin-B1 Fc, respectively. Immunoprecipitated EphA2 and EphB2 were probed with anti-phosphotyrosine antibodies and reprobbed with anti-EphA2 or anti-EphB2 antibodies. (D) The YSA peptide causes EphA2 tyrosine-phosphorylation. COS cells were left untreated or stimulated with the YSA EphA2-activating peptide, a control (ctrl) peptide, or ephrin-A1 Fc. Lysates were used for immunoprecipitation with monoclonal anti-EphA2 antibodies. The immunoprecipitates were probed with anti-phosphotyrosine antibodies and reprobbed with polyclonal anti-EphA2 antibodies. (E) Activation of EphA2 induces COS cell retraction. COS cells stimulated as in D were stained with rhodamine-phalloidin. (F) Histogram showing the percentage of cells that have spikes at the periphery, indicating cell retraction, in a representative experiment as in D and E. Bars, 20  $\mu$ m.

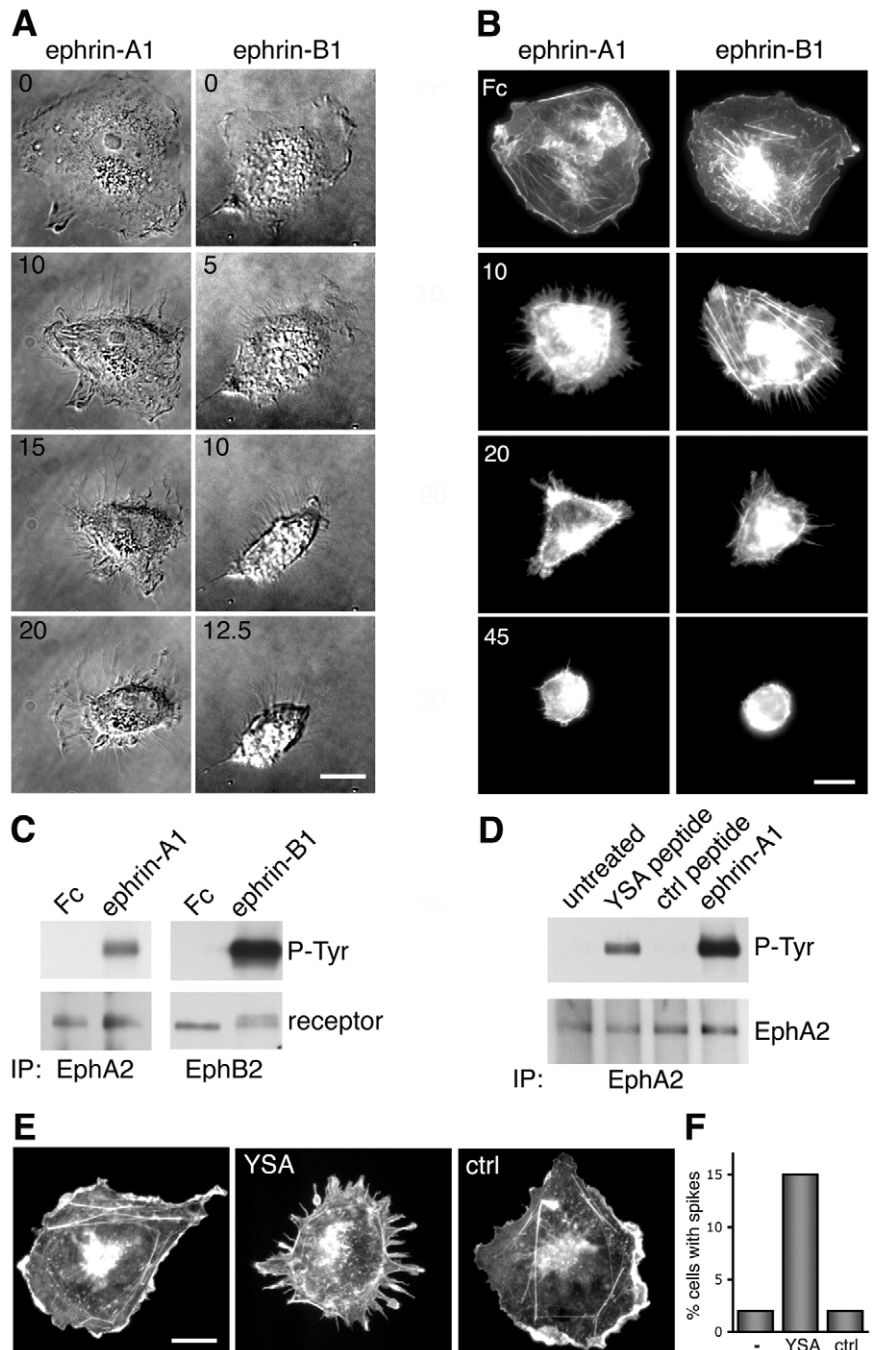

cells are somewhat more spread than control-transfected cells in the absence of ephrins (data not shown) and do not retract following ephrin-A1 or ephrin-B1 treatment (Fig. 2B,D; Table 1).

Surprisingly, R-Ras38V also completely blocks cell retraction (Fig. 2B,D; Table 1), suggesting that R-Ras inactivation by phosphorylation at tyrosine 66 does not significantly contribute to retraction of the cell periphery. These effects of GTP-bound R-Ras38V are selective, because GTP-bound H-Ras does not inhibit ephrin-induced COS cell retraction (Fig. 2E,F). By contrast, R-Ras 38V does not block cell retraction if it contains a tyrosine 66 to glutamic acid mutation, which introduces a negative charge similar to that of a phosphate group (see supplementary material Fig. S3; Table 1). It should be noted that this R-Ras38VY66E mutant was well expressed in the COS cells used in this experiment (not shown), in contrast to previous reports in CHO cells (Oertli et al., 2000). The lack of inhibition of cell retraction by R-Ras38VY66E indicates that modification of tyrosine 66 could impair the effects of GTP-bound R-Ras on cell retraction, for example by preventing binding to an effector (Table 1), thus confirming that R-Ras38V is not sufficiently inactivated by phosphorylation in this assay.

Finally, R-RasY66F, in which tyrosine 66 cannot be phosphorylated but the GTPase activity of R-Ras is normal, does not inhibit ephrin-induced cell retraction (Fig. 2B,D;

Table 1). These data indicate that efficient COS cell retraction following ephrin-A1 or ephrin-B1 stimulation requires low levels of GTP-bound active R-Ras and suggest that endogenous Eph receptor signals can decrease the levels of R-RasGTP.

#### Ephrin stimulation decreases the levels of GTP-bound R-Ras

To investigate the effects of ephrin treatment on the levels of GTP-bound R-Ras, we performed a pull-down assay using a GST fusion protein of the Ras-binding domain of Raf1, which binds only to the activated form of R-Ras (de Rooij and Bos, 1997). This assay was performed without treating the cell lysates with the phosphatase inhibitor vanadate, to reduce any



**Fig. 2.** GTP-bound R-Ras inhibits ephrin-induced COS cell retraction. (A,B) COS cells were transiently transfected with the indicated EGFP-tagged R-Ras constructs or the EGFP vector as a control. Cells were stimulated with ephrin-A1 Fc, ephrin-B1 Fc or Fc control and stained with rhodamine-phalloidin (red). (C,D) Histogram showing the percentage of transfected (EGFP-positive) cells that have spikes at the periphery, indicating cell retraction, in representative experiments. Cells expressing R-Ras38V or R-Ras38VY66F, which cannot hydrolyze GTP, do not retract in response to ephrin stimulation. (E) GTP-bound H-Ras does not inhibit ephrin-induced COS cell retraction. COS cells were transiently transfected with EGFP together with either constitutively active H-RasV12 or pcDNA3 as a control. Cells were stimulated and stained as in A and B. (F) Histogram as in C and D. Cells expressing H-RasV12 undergo peripheral retraction similar to control cells, in response to ephrin stimulation. Bars, 20  $\mu$ m.

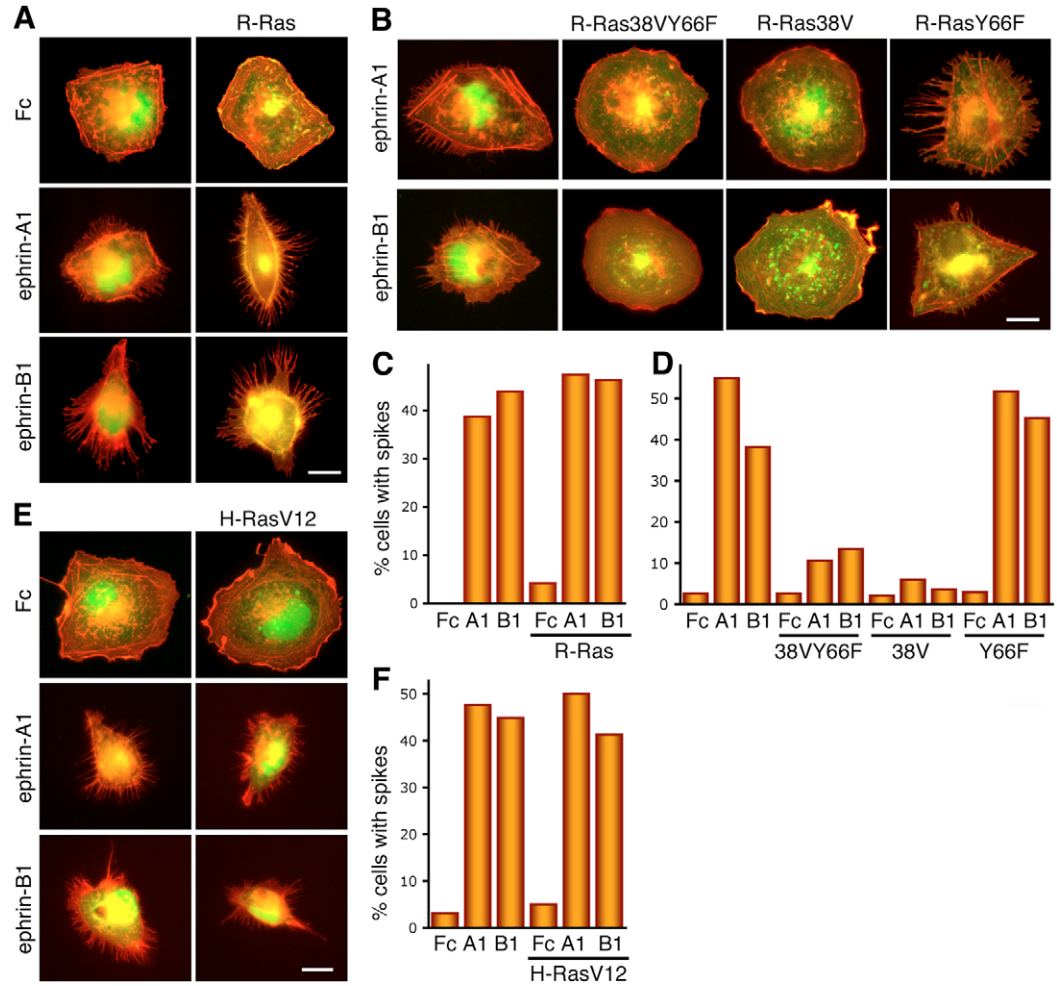

tyrosine 66 phosphorylation that may be present and inhibit Raf1 binding (Zou et al., 1999). Immunoblotting of the proteins bound to the GST-Raf1 fusion protein with anti-R-Ras antibody showed that ephrin-A1 and ephrin-B1 both decrease the levels of R-RasGTP (Fig. 3). Furthermore, the time course of R-Ras inactivation correlates with that of cell retraction. The

findings that R-RasGTP inhibits COS cell retraction and that Eph receptors decrease R-RasGTP levels suggest that Eph receptors reduce R-RasGTP levels to induce cell retraction.

**Eph receptors regulate R-Ras through p120RasGAP**  
The Eph receptors could decrease the levels of GTP-bound R-

**Table 1. Raf1 binding and effects of R-Ras mutants on ephrin-mediated repulsive responses**

| R-Ras construct | RBD binding*      | Inhibits cell retraction <sup>†,‡</sup> | Inhibits cell migration <sup>†</sup> | Inhibits growth-cone collapse <sup>†</sup> |
|-----------------|-------------------|-----------------------------------------|--------------------------------------|--------------------------------------------|
| WT              | +                 | No                                      | n.d.                                 | No                                         |
| 38V             | ++++ <sup>§</sup> | Yes                                     | No                                   | Yes/no                                     |
| 38VY66F         | ++ <sup>§</sup>   | Yes                                     | Yes                                  | Yes                                        |
| 38VY66E         | - <sup>§</sup>    | No                                      | No                                   | n.d.                                       |
| Y66F            | + <sup>¶</sup>    | No                                      | No                                   | Yes                                        |
| Y66E            | - <sup>¶</sup>    | No <sup>††</sup>                        | n.d.                                 | n.d.                                       |
| 43N             | -**               | No <sup>††</sup>                        | n.d.                                 | n.d.                                       |

\*Independent of phosphorylation on tyrosine 66 because orthovanadate was not included in the buffers; RBD, Ras-binding domain of Raf1.

<sup>†</sup>Induced by ephrin stimulation.

<sup>‡</sup>The R-Ras Y66E and 43N mutants do not cause cell retraction in the absence of ephrin, suggesting that R-Ras inactivation is not sufficient to cause cell retraction.

<sup>§</sup>See supplementary material Fig. S5.

<sup>¶</sup>Zou et al., 1999.

\*\*Based on the GTP-binding deficiency of this mutant.

<sup>††</sup>Data not shown.

n.d., not determined.

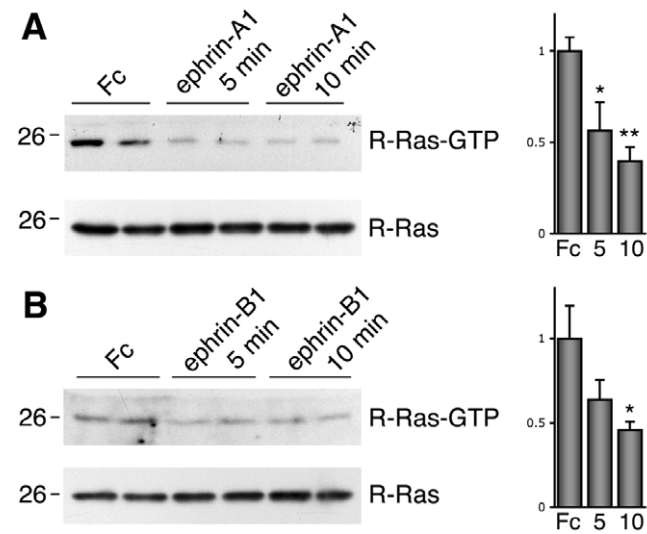

**Fig. 3.** Ephrin stimulation decreases the level of GTP-bound R-Ras. COS cells stably transfected with R-Ras were stimulated with ephrin-A1 Fc (A), ephrin-B1 Fc (B) or Fc as a control. GTP-bound R-Ras was isolated with GST-Raf1 RBD and detected with anti-R-Ras antibodies. The histograms show the mean levels of GTP-bound R-Ras relative to control from three experiments; the bars represent standard errors. Levels of GTP-bound R-Ras in ephrin Fc-treated cells were compared with those in Fc-treated cells by one-way ANOVA and Tukey's post-hoc test. \* $P<0.05$ ; \*\* $P<0.01$ .

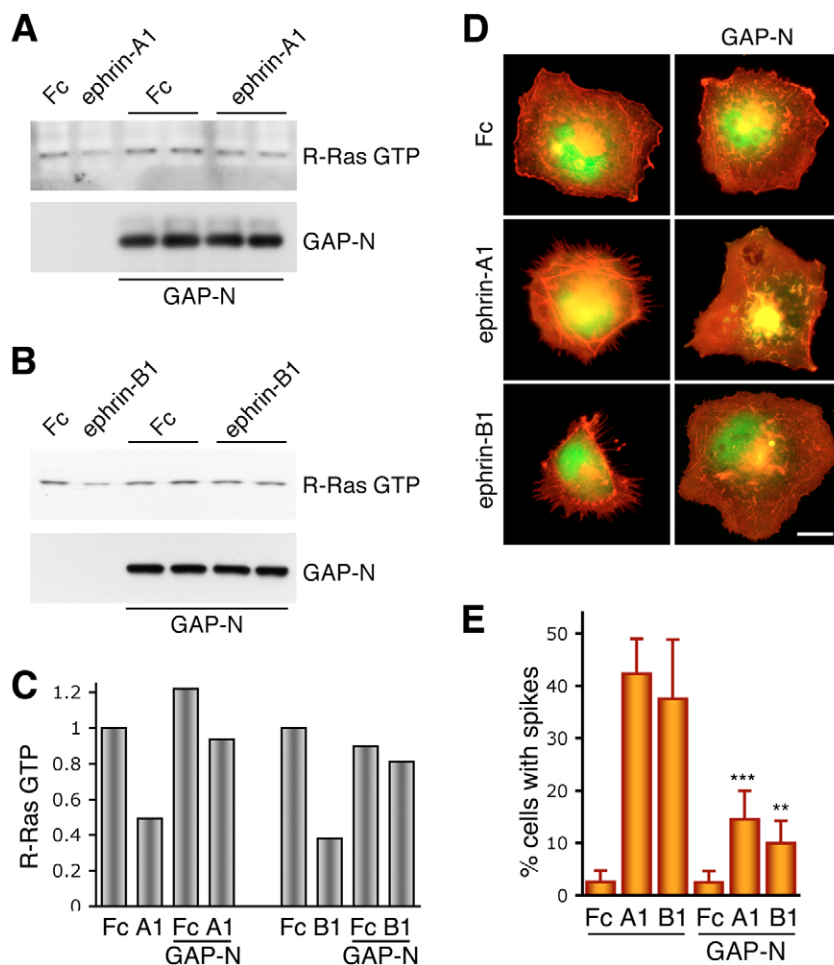

**Fig. 4.** A dominant negative form of p120RasGAP prevents the decrease in R-RasGTP levels and COS cell retraction induced by ephrins. (A,B) A COS cell line stably transfected with R-Ras was transiently transfected with a dominant negative form of p120RasGAP (GAP-N) or pCDNA3 vector control and stimulated with ephrin-A1 Fc, ephrin-B1 Fc or Fc as a control. GTP-bound R-Ras was isolated with GST-Raf1 RBD and detected with anti-R-Ras antibodies in duplicate samples for the GAP-N transfected cells. (C) The histogram shows the relative levels of R-Ras GTP quantified from the experiment in A and B and normalized to the R-Ras levels in the lysates. (D) COS cells were transiently transfected with EGFP-tagged GAP-N or EGFP vector as a control. Cells were stimulated with ephrin-A1 Fc, ephrin-B1 Fc or Fc as a control and stained with rhodamine-phalloidin (red). Bar, 20  $\mu\text{m}$ . (E) Histogram showing the mean percentage of cells that have spikes at the periphery; bars represent standard errors from three experiments. GAP-N-transfected cells treated with ephrin-A1 Fc or ephrin-B1 Fc were compared with similarly treated control-transfected cells by one-way ANOVA and Tukey's post-hoc test, \*\* $P<0.01$  and \*\*\* $P<0.001$ .

Ras either by inhibiting the activity of an exchange factor for R-Ras or by enhancing the activity of a GTPase-activating protein. A R-Ras exchange factor that could conceivably be regulated by Eph receptors is C3G. C3G is activated through its association with Crk (Ichiba et al., 1997), an adaptor protein that binds to activated EphA and EphB receptors and has been implicated in their effects on cell morphology (Hock et al., 1998; Lawrenson et al., 2002; Nagashima et al., 2002; Smith et al., 2004). Binding of Crk to C3G is inhibited by Crk phosphorylation at tyrosine 221 (Feller et al., 1994) and we found that treatment of COS cells with ephrin-B1 causes an increase in Crk tyrosine phosphorylation (see supplementary material Fig. S4A). However, ephrin-B1 treatment still decreases R-RasGTP levels and causes retraction in COS cells expressing CrkY221F, a mutant of Crk that cannot be inactivated by phosphorylation (see supplementary material Fig. S4B and C). Thus, negative regulation of C3G through Crk phosphorylation does not appear to play a major role in R-Ras inactivation by Eph receptors in COS cells.

p120RasGAP is a GTPase-activating protein that has preferential activity toward R-Ras and functions downstream of both EphA2 (Tong et al., 2003) and EphB2 (Holland et al., 1997; Li et al., 1997; Tong et al., 2003). The activity of p120RasGAP can be inhibited using GAP-N, a truncated form that contains the SH2 domains of p120RasGAP (which mediate binding to activated receptor tyrosine kinases) but lacks the GAP domain (Elowe et al., 2001). Importantly, GAP-N is known to function as a dominant negative in EphB2 signaling (Elowe et al., 2001). We found that expression of GAP-N prevents both the decrease in R-RasGTP levels (Fig. 4A-C) and the cell retraction (Fig. 4D,E) that occurs after ephrin stimulation. These data are consistent with a model whereby

p120RasGAP mediates the morphological effects of activated EphA and EphB receptors by reducing R-RasGTP, which enables COS cell retraction and rounding. Indeed, co-transfection of the dominant negative R-Ras43N with GAP-N appears to restore cell retraction in ephrin-treated cells (data not shown). A caveat with the interpretation of this experiment, however, is that although transfection of R-Ras43N alone or GAP-N alone does not affect cell morphology, many of the R-Ras43N and GAP-N co-transfected cells had to be excluded from analysis because of abnormal morphology both in the presence and in the absence of ephrin treatment.

It should be noted that although p120RasGAP has been reported to mediate neurite retraction downstream of EphB2 in a neuronal cell line through inactivation of H-Ras (Elowe et al., 2001), the constitutively active H-RasV12 mutant does not inhibit ephrin-dependent retraction of the COS cell periphery (Fig. 2E,F). Thus, inactivation of R-Ras and not H-Ras plays a role in the repulsive effects of Eph receptors in COS cells.

#### GTP-bound R-Ras inhibits the repulsive effects of ephrin-B1 on COS cell migration only if it cannot be phosphorylated at tyrosine 66

In addition to modulating cell shape, the Eph receptors regulate cell motility (Pasquale, 2005). For example, ephrin-B1 inhibits COS cell haptotactic migration towards fibronectin (Fig. 5A). Similar to its effect on ephrin-induced cell retraction, the R-Ras38VY66F mutant also counteracts the repulsive effect of ephrin-B1 on cell migration (Fig. 5A; Table 1). However, both R-Ras38V and R-RasY66F fail to do so (Fig. 5B; Table 1). These drastically different activities of R-Ras38V and R-Ras38VY66F suggest that phosphorylation of R-Ras at tyrosine 66 contributes to the negative effects of ephrin-B1 on cell migration. To confirm the importance of tyrosine 66, we used the R-Ras38VY66E mutant. Cells expressing R-Ras38VY66E display reduced migration in the presence of ephrin-B1, similar to control-transfected cells (Fig. 5C; Table 1), confirming that a negative charge at position 66 impairs the ability of R-Ras to counteract the effects of Eph receptors. Supporting a role for R-Ras phosphorylation, we detected an increase of tyrosine-phosphorylated R-Ras in ephrin-B1-stimulated COS cells (Fig. 5D). We also confirmed that the R-Ras38V mutant is susceptible to tyrosine phosphorylation (data not shown). Therefore, these data suggest that either decreased R-RasGTP or phosphorylation of tyrosine 66 is sufficient to inhibit COS cell migration.

#### Eph receptors inactivate R-Ras to induce growth cone collapse in hippocampal and retinal neurons

The retraction of the COS cell periphery that occurs following ephrin stimulation is reminiscent of the retraction of growth cones that occurs in neurons during growth cone collapse, suggesting that activated R-Ras may also inhibit ephrin-induced growth cone collapse. GTP-bound R-Ras has indeed been recently shown to inhibit growth cone collapse induced by semaphorins in cultured rat hippocampal neurons, while R-Ras knockdown by treatment with siRNA increases the number of growth cones with collapsed morphology under basal conditions (Oinuma et al., 2004a). Neurons cultured from the embryonic rat hippocampus express endogenous R-Ras (Fig. 6A) and are responsive to both ephrin-A1 and ephrin-B1 (Fig. 6B,C). Expression of wild-type R-Ras increases the fraction of

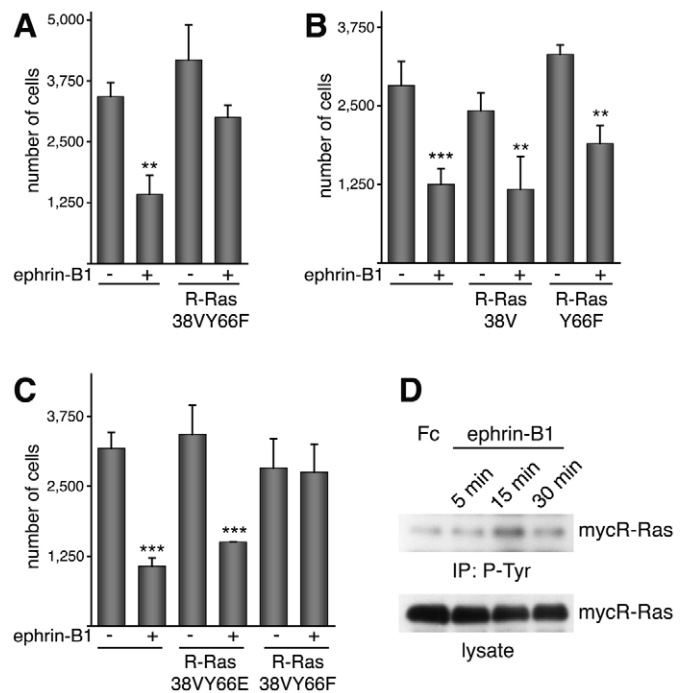

**Fig. 5.** GTP-bound R-Ras that cannot be phosphorylated on tyrosine 66 prevents the repulsive effects of ephrin-B1 Fc on COS cell migration. (A-C) Equal numbers of COS cells transfected with the indicated constructs were seeded on Transwell filters coated on the underside with fibronectin. Cells were allowed to migrate through the filters towards medium containing ephrin-B1 Fc or Fc as a control. The histograms show the mean number of transfected (EGFP-positive) cells that migrated through a filter in 3 hours. Bars indicate the standard deviations from measurements from three different filters. For each transfection, ephrin-B1 Fc-treated samples were compared with Fc-treated samples by one-way ANOVA and Tukey's post-hoc test, \*\* $P < 0.01$  and \*\*\* $P < 0.001$ . (D) R-Ras is tyrosine phosphorylated in ephrin-B1 Fc-stimulated COS cells. Cells transiently transfected with Myc-tagged R-Ras were treated with ephrin-B1 Fc for the indicated times or with Fc for 30 minutes as a control. Tyrosine-phosphorylated proteins were immunoprecipitated with anti-phosphotyrosine antibodies and probed with anti-Myc antibodies to detect phosphorylated Myc-R-Ras.

well spread growth cones (Fig. 6B,C), which still collapse following ephrin-A1 stimulation and, to a lesser extent, following ephrin-B1 stimulation (Fig. 6C). Interestingly, R-Ras38VY66F, R-Ras38V and R-RasY66F all significantly inhibit growth cone collapse, although R-Ras38V does not completely block ephrin-A1-induced growth cone collapse (Fig. 6C; Table 1). The increased spreading of growth cones in neurons transfected with wild-type R-Ras and the ability of both the R-Ras38V and the R-RasY66F mutants to inhibit ephrin-induced growth cone collapse suggest that R-Ras is highly activated in hippocampal neurons. Therefore, Eph receptor signaling may inactivate R-Ras sufficiently to cause growth cone collapse in hippocampal neurons only through the combined effects of tyrosine phosphorylation and increased GTP hydrolysis.

In temporal retinal explants, where growth cones are well known to collapse in response to ephrin-A5 treatment (Drescher et al., 1995), R-Ras38VY66F also inhibits collapse



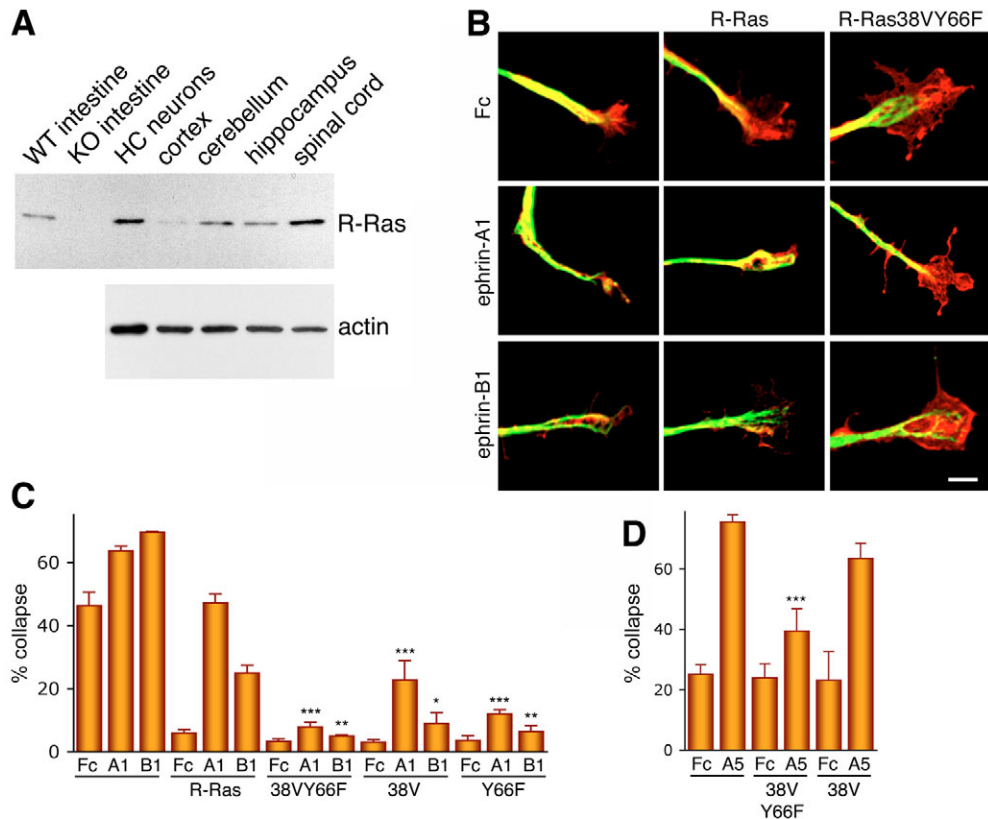

**Fig. 6.** Effects of R-Ras mutants on ephrin-induced growth cone collapse in hippocampal and retinal neurons. (A) R-Ras is expressed in hippocampal neurons and in various P10 brain regions. Lysates of primary rat hippocampal (HC) neurons cultured for 14 days and lysates from various mouse brain regions were probed by immunoblotting for R-Ras and actin as a loading control. Probing of lysates from intestine of wild-type (WT) mice, but not R-Ras knockout (KO) mice (Komatsu and Ruoslahti, 2005), shows the presence of the R-Ras band. (B,C) Expression of R-Ras38V, R-RasY66F or R-Ras38VY66F prevents ephrin-induced growth collapse in primary hippocampal neurons. Primary rat hippocampal neurons were transfected with the indicated EGFP-tagged R-Ras constructs and stimulated with ephrin-A1 Fc, ephrin-B1 Fc or Fc as a control. Neurons were labeled with anti-tubulin antibodies (blue, digitally converted to green) and phalloidin (red). Bar, 20  $\mu$ m. Growth cones from transfected (EGFP-positive) neurons were classified as 'collapsed' when the actin staining did not extend beyond the tubulin staining. For each condition, approximately 500-600 total growth cones from three experiments were scored blindly. The histogram in C shows the mean percentages of collapsed growth cones under the indicated conditions; bars represent the standard error from three experiments. Although 40% of growth cones in control-transfected neurons had a non-spread collapsed appearance, ephrin treatment caused significant collapse ( $P < 0.01$  for ephrin-A1 Fc-treated versus Fc-treated and  $P < 0.001$  for ephrin-B1 Fc-treated versus Fc-treated by one-way ANOVA and Tukey's post-hoc test). Growth cone collapse was also significant in neurons transfected with wild-type R-Ras ( $P < 0.001$  for both ephrins). Growth cones transfected with the indicated plasmids and treated with ephrin-A1 Fc or ephrin-B1 Fc were also compared with similarly treated R-Ras-transfected growth cones by one-way ANOVA and Tukey's post-hoc test,  $*P < 0.05$ ,  $**P < 0.01$  and  $***P < 0.001$ . (D) Expression of R-Ras38VY66F, but not R-Ras38V, prevents ephrin-A5-induced growth collapse in dissociated cultures of chicken retinal neurons. Growth cones from transfected (EGFP-positive) neurons were classified as 'collapsed' based on a spread or collapsed morphology after phalloidin labeling. For each condition, ~100-400 total growth cones from several experiments were counted. The histogram shows the percentage of collapsed growth cones under the indicated conditions; bars represent the standard error. Transfected growth cones treated with ephrin-A5 Fc were compared with similarly treated control-transfected growth cones by one-way ANOVA and Tukey's post-hoc test,  $***P < 0.001$ .

(Fig. 6D). By contrast, we did not observe a significant effect of R-Ras38V on growth cone collapse (Fig. 6D). Because R-Ras38V can be inactivated by phosphorylation, this is consistent with a role for R-Ras tyrosine phosphorylation downstream of EphA receptors in retinal neurons.

## Discussion

We found that EphA as well as EphB receptor stimulation by ephrins decreases the levels of R-RasGTP, in addition to inhibiting the activity of GTP-bound R-Ras through phosphorylation. Expression of a dominant negative form of

the GTPase-activating protein, p120RasGAP, prevented the decrease in R-Ras GTP levels and COS cell retraction, downstream of Eph receptors, implicating p120RasGAP in these effects. Indeed, p120RasGAP has been shown to interact with activated Eph receptors through its two SH2 domains (Holland et al., 1997). Although p120RasGAP is an established regulator of H-Ras, this GTPase-activating protein has been shown to preferentially regulate R-Ras in vitro (Li et al., 1997) and, here, we demonstrate that it regulates R-RasGTP levels in COS cells. Experiments with the same dominant-negative mutant have linked p120RasGAP to the ephrin-dependent

decrease in H-Ras activity and neurite retraction in neuronal NG108 cells stably expressing EphB2 (Elowe et al., 2001). Therefore, p120RasGAP enables the characteristic repulsive signals of Eph receptors, whereas its role downstream of growth factor receptor tyrosine kinases probably is to terminate activation of the H-Ras-MAP kinase pathway induced by these receptors (Ekman et al., 1999; Tong et al., 2003).

We have not found evidence that inhibition of an exchange factor for R-Ras, such as C3G, plays a role in COS cell retraction downstream of Eph receptors. We also have not found evidence for a role of SHEP1, a signaling intermediate that binds to Eph receptors through its SH2 domain and to R-Ras through an exchange factor-like domain (Dodelet et al., 1999). A truncated form of SHEP1 containing the SH2 domain but not the exchange factor-like domain, which, like the truncated form of p120RasGAP, should act as a dominant negative, did not inhibit COS cell retraction (data not shown).

R-Ras is one of several Ras family proteins that have been implicated in repulsive responses initiated by EphB2 in different cell types. In the EphB2-NG108 cells, transfection with the constitutively active H-RasV12 mutant prevents neurite retraction induced by ephrin-B1 stimulation, consistent with a role for inactivation of H-Ras in this repulsive response (Elowe et al., 2001). We also found that H-RasGTP levels were decreased in COS cells stimulated with ephrin-B1 (data not shown). However, expression of H-RasV12 did not prevent COS cell retraction, suggesting that H-Ras is not involved in this repulsive response in COS cells. Another Ras protein, Rap1, has also been recently implicated in Eph-mediated repulsion. The constitutively active Rap1V12 mutant was shown to prevent ephrin-B1-induced retraction and rounding of DLD1 colon cells (Riedl et al., 2005). The contribution of specific Ras family proteins to Eph receptor-mediated repulsive signals probably depends on cell type-specific differences in the function or relative abundance of the Ras proteins. For example, we only detected low levels of Rap1 in the COS cells used in our experiments (data not shown). Alternatively, R-Ras and Rap1 may also function in a common pathway (Self et al., 2001).

The convergence of ephrin and semaphorin repulsive signaling pathways on R-Ras suggests that both classes of molecules act in concert to guide axons in the developing nervous system. For example, ephrins and semaphorins could guide axonal projections at different points along their trajectory or enhance each other's repulsive effects by signaling through a common effector, R-Ras. The Plexin semaphorin receptors can directly regulate R-RasGTP levels through their intrinsic R-Ras GAP activity, instead of binding a GTPase-activating protein such as p120RasGAP (Oinuma et al., 2004a). However, the R-Ras GAP activity of the Plexins requires coincident semaphorin engagement and intracellular association with Rnd1, a Rho family GTPase, suggesting a tightly controlled regulation of R-Ras activity (Oinuma et al., 2004a; Oinuma et al., 2004b). Whether the Plexin receptors, which do not have a kinase domain, may also cause R-Ras phosphorylation by recruiting a tyrosine kinase remains to be determined. The Src family kinase Fyn, for example, functions in semaphorin signaling, and Src has been reported to phosphorylate R-Ras on tyrosine 66 (Sasaki et al., 2002; Zou et al., 2002). Indeed, Src may also contribute to R-Ras phosphorylation downstream of Eph receptors (Zisch et al.,

1998; Zou et al., 1999). We found that the Src inhibitor PP2 inhibits ephrin-induced cell retraction at a concentration of 0.5  $\mu$ M (data not shown). However, these effects may also be explained by an inhibition of phosphorylation of Rho family exchange factors by Src family kinases (Sahin et al., 2005). In addition, we found that PP2 partially inhibits ephrin-induced tyrosine phosphorylation of EphB2 (but not EphA2), and thus probably inhibits EphB2 kinase activity (data not shown).

The combined effects of increased GTP hydrolysis and phosphorylation may sometimes be necessary to achieve sufficient R-Ras inactivation to enable repulsive responses, as is the case for ephrin-dependent growth cone collapse in hippocampal neurons transfected with R-Ras. However, the two modes of R-Ras inactivation downstream of Eph receptors may also have different consequences. Reducing R-RasGTP levels turns off R-Ras signals completely. Phosphorylation of tyrosine 66, which is in the effector domain, could inhibit interaction of GTP-bound R-Ras with some effectors but not others, similar to previously described effector loop point mutations (Oertli et al., 2000; Osada et al., 1999; Zou et al., 1999). Inactivating modifications of tyrosine 66, however, seem to impair most of the activities of R-RasGTP investigated so far (Kinashi et al., 2000; Oertli et al., 2000; Osada et al., 1999) (this study). Phosphorylation of tyrosine 66 may also serve some other, as yet unknown, function, in addition to regulating R-Ras effector binding. For example, it could create a binding site for an SH2 domain or induce a conformational change affecting R-Ras function.

Whether the two different modes of R-Ras regulation may be spatially or temporally separate remains to be determined. We found that both R-Ras phosphorylation and increased GTP hydrolysis are important for inhibition of COS cell migration, whereas R-Ras phosphorylation does not seem to play a role in retraction of the COS cell periphery. A possible explanation for this result is that the pool of GTP-bound R-Ras that is concentrated in pseudopodia at the leading edge of migrating COS cells (Wozniak et al., 2005) may be particularly susceptible to phosphorylation by activated Eph receptors. This could result in a localized high concentration of phosphorylated R-Ras in pseudopodia, which probably plays a critical role in inhibiting directional migration.

Cell retraction and rounding as well as growth cone collapse typically involve contraction of the cytoskeleton, a process regulated by the Rho family GTPase, RhoA (Nobes and Hall, 1995; Ridley and Hall, 1992), and weakening of cell-substrate adhesion mediated by integrins. Consistent with this scenario, we found that inhibition of the RhoA-Rho kinase pathway with the Y-27632 compound and activation of integrins with manganese both prevent ephrin-induced COS cell retraction. Indeed, RhoA is known to be activated downstream of both EphA and EphB receptors (Cowan et al., 2005; Lawrenson et al., 2002; Ogita et al., 2003; Shamah et al., 2001; Tanaka et al., 2003; Wahl et al., 2000). For example, RhoA activity has been shown to be required for ephrin-A5-mediated growth cone collapse in retinal neurons and EphB2-mediated retraction and rounding of colon cells (Riedl et al., 2005; Wahl et al., 2000). Both R-Ras inactivation and RhoA activation have also been implicated in semaphorin-mediated repulsive responses (Oinuma et al., 2004a; Oinuma et al., 2004b; Pasterkamp, 2005) and in the retraction and rounding of fibroblasts and epithelial cells exposed to *Clostridium difficile* toxin B variants



(Chaves-Olarte et al., 2003). Interestingly, these toxins inactivate R-Ras through a third mechanism: glucosylation. The ability of both Eph receptors and Plexins to regulate RhoA activity supports a scenario where R-Ras and RhoA act in concert, downstream of repulsive molecules. Consistent with the requirement for other pathways in the ephrin repulsive effects, we found that expression of dominant negative R-Ras43N or of R-RasY66E is insufficient to induce cell retraction (data not shown).

R-Ras itself may also influence RhoA activity, but this regulation appears to be complex and, probably, cell-type specific. R-Ras has been found to increase RhoA activity in some cell types, such as T47D breast cancer cells and non-transformed MCF10A breast epithelial cells (Jeong et al., 2005; Wozniak et al., 2005). Furthermore, R-Ras has been reported to inhibit Rac activity in T47D cells (Wozniak et al., 2005), which may lead to increased RhoA activity (Burrige and Wennerberg, 2004). However, R-Ras activates Rac in 32D myeloid cells (Holly et al., 2005) whereas no effect of R-Ras on Rac activity was detected in another breast cancer cell line, MCF7, and in MCF10A breast epithelial cells (Felekkis et al., 2005; Jeong et al., 2005). Therefore, R-Ras inhibition downstream of repulsive molecules may in some cases enhance and in other cases suppress RhoA activity, directly or indirectly through Rac, thus modulating RhoA activation by the repulsive molecule.

R-Ras is also known to positively regulate integrin function in many cell types (Holly et al., 2005; Hughes et al., 2001; Keely et al., 1999; Oertli et al., 2000; Sethi et al., 1999; Zhang et al., 1996; Zou et al., 1999) and activated R-Ras reportedly localizes to focal adhesions through the hypervariable region at the carboxyl terminus, which is also the region important for integrin activation (Furuhjelm and Peranen, 2003; Hansen et al., 2002; Oertli et al., 2000). Furthermore, activated R-Ras enhances the formation of focal adhesions in some cells (Kwong et al., 2003). Although R-Ras has not been detected in the focal adhesions of COS cells (Furuhjelm and Peranen, 2003), we observed that activated R-Ras enhances COS cell spreading, similar to manganese treatment. Furthermore, R-Ras causes spreading and enlargement of neuronal growth cones. These data suggest that activated R-Ras may counteract the repulsive effects of Eph receptors at least in part by promoting integrin adhesive function.

Whereas the signals regulating R-Ras inactivation are beginning to be elucidated, those causing activation of R-Ras remain elusive. Nevertheless, activated forms of R-Ras have been linked to cell transformation (Cox et al., 1994; Jeong et al., 2005; Keely et al., 1999; Nishigaki et al., 2005; Osada et al., 1999; Rincon-Arango et al., 2003; Saez et al., 1994; Zou et al., 2002). Given recent data that EphB2 has tumor suppressor activity in prostate and colorectal cancer (Battle et al., 2005; Huusko et al., 2004), it is tempting to speculate that Eph receptors may exert anti-tumorigenic effects at least in part by negatively regulating R-Ras.

Here we demonstrate that constitutively active R-Ras can counteract the repulsive effects of both EphA and EphB receptors. Activated R-Ras has also been recently shown to prevent the repulsive effects of the PlexinA and PlexinB semaphorin receptors (Oinuma et al., 2004a). Therefore, R-Ras38VY66F – the mutant that is insensitive to negative regulation by either phosphorylation or GTP hydrolysis – could

be useful to promote the outgrowth of neuronal processes in non-permissive environments. For example, this mutant might be particularly effective in promoting axon regeneration after acute nervous system injury or in reversing the effects of neurodegeneration, by allowing axon growth even in the presence of different classes of repulsive molecules such as semaphorins and ephrins.

## Materials and Methods

### Constructs

The EGFP-R-Ras constructs were obtained by subcloning wild-type R-Ras into pEGFP-C2 (Clontech), and R-Ras38V, R-RasY66F and R-Ras38VY66F into pEGFP-C1. R-Ras 38VY66E was cloned into both pEGFP-C2 and pcDNA3-myc (Invitrogen). GAP-N, containing nucleotides 1-1326 of human p120RasGAP, was generated by PCR from a cDNA clone (GenBank™ accession number BC033015) and inserted into pcDNA3-myc and pEGFP-C2. pCAGGS-myc-CrkY221F and pEGFP-CrkY221F have been described previously (Abassi and Vuori, 2002). pGEX-Raf1 RBD has been described previously (de Rooij and Bos, 1997).

### Antibodies

The anti-EphB2 antibody was obtained using a GST fusion protein comprising amino acids 897-995 of chicken EphB2 (Holash and Pasquale, 1995) as the antigen; anti-EphA2 antibodies were from Upstate Inc. (monoclonal) and Zymed Laboratories Inc. (polyclonal); anti-Crk antibodies were from BD Pharmingen; the anti-RasGAP and anti- $\alpha$ -tubulin antibodies were from Santa Cruz Biotechnology; the Tuj1 anti-beta-III-tubulin was from ABCO; the anti-R-Ras antibody was from Cell Signaling Technologies; the anti-Myc 9E10 monoclonal antibody and anti-phosphotyrosine antibody conjugated to agarose were from Sigma; the anti-Fc antibody used for clustering Fc fusion proteins was from Jackson Laboratory; the anti-phosphotyrosine antibody conjugated to horseradish peroxidase was from BD Pharmingen or Upstate Inc. Secondary anti-mouse and anti-rabbit IgG peroxidase-conjugated antibodies were from Amersham Biosciences fluorescent Alexa Fluor 647-goat anti mouse was from Molecular Probes; and anti-protein A peroxidase-conjugated antibody was from Bio-Rad.

### Cell culture and transfections

COS cells were maintained in DMEM supplemented with 10% fetal bovine serum (FBS), penicillin and streptomycin. Transient transfections of COS cells were carried out using Superfect Transfection Reagent (Qiagen Inc.) or FuGENE 6 (Amersham Biosciences) and cells were harvested 24-48 hours after transfection. Co-transfected EGFP (1:10) was used to identify the transfected cells. COS cells stably expressing R-Ras were generated using Superfect Transfection Reagent and screening G418 resistant clones by immunoblotting for R-Ras expression.

Primary hippocampal neurons were prepared from E17 time-pregnant Harlan-Sprague-Dawley rats and immediately transfected using Amaxa Nucleofector Technology (Amaxa Biosystems) according to the manufacturer's protocol. Briefly, for each construct  $5 \times 10^6$  neurons were suspended in 100  $\mu$ l of Nucleofector solution with 3  $\mu$ g DNA and electroporated using program G-13. Transfected neurons were plated in Dulbecco's modified Eagle's medium (DMEM) containing 10% fetal bovine serum (FBS; 50,000 cells/24-well) on coverslips coated with 50  $\mu$ g/ml poly-D-lysine and 5  $\mu$ g/ml laminin (Sigma). Two hours after plating, the medium was replaced with Neurobasal medium containing B-27 supplement.

Retinal neurons were prepared from E6-E7 chicken retinas that were cut into three stripes parallel to the dorsoventral axis. The stripes corresponding to the temporal third of the retina were dissociated in 0.1% trypsin (Worthington Biochemicals) and, following several washes, the cells were resuspended in DMEM-F12 medium and counted. The volume of the cell suspension was adjusted to obtain a final plating density of  $2.5 \times 10^5$  cells/mm<sup>2</sup> and mixtures of plasmids and Lipofectamine-2000 (Invitrogen) prepared in Hanks' balanced salt solution (HBSS) according to the recommendations of the manufacturer were added before plating cells. The cells were plated on poly-L-lysine (200  $\mu$ g/ml) and laminin (20  $\mu$ g/ml)-coated coverslips. Final concentrations of plasmids were 0.3-0.6  $\mu$ g/10<sup>5</sup> cells and Lipofectamine was used at 0.3-0.6  $\mu$ l/10<sup>5</sup> cells. The cells were kept in the incubator for 1 hour and then 1 ml DMEM-F12 medium plus N2 supplement was added to the cultures. On the next day the medium was renewed.

### COS cell retraction

For time-lapse microscopy, COS cells were seeded on 35 mm glass-bottom Petri dishes (MatTek Corporation) and 16 hours later, the cells were starved for 3 hours in DMEM with 0.5% FBS. The plates were then mounted on a plate heater and images were obtained with SPOT software.

For immunofluorescence microscopy with COS cells, untransfected COS cells or COS cells transiently transfected for 24 hours were plated onto glass coverslips. Sixteen hours later, cells were starved for 3 hours in DME with 0.5% FBS and stimulated with 150  $\mu$ M YSA EphA2-binding peptide (YSAYPDSVPMMS) or ephrin Fc fusion proteins. For ephrin stimulation experiments, 1  $\mu$ g/ml ephrin-A1

Fc, 1-2  $\mu\text{g/ml}$  ephrin-B1 Fc or 0.5-1  $\mu\text{g/ml}$  Fc as a control. In all experiments, the Fc fusion proteins were preclustered with a 1/10 concentration of anti-Fc antibodies. All Fc proteins were from R & D Systems. The cells were then fixed with 4% formaldehyde in PBS, permeabilized in 0.1% Triton X-100 in PBS and stained with rhodamine-conjugated phalloidin (Molecular Probes).

### Growth cone collapse assays

Forty-eight hours after transfection and plating, hippocampal neurons were stimulated for 20 minutes with 1.5  $\mu\text{g/ml}$  preclustered ephrin-A1 Fc, ephrin-B1 Fc or Fc, fixed in 4% paraformaldehyde and blocked/permeabilized for 2 hours in TBS containing 0.1% Triton X-100 and 5% goat serum (Sternberger Monoclonals, Lutherville, MD). Neurons were then stained with an anti- $\alpha$ -tubulin antibody followed by goat anti-mouse Alexa Fluor 647 (Molecular Probes) and with rhodamine-phalloidin to detect filamentous actin. Coverslips were mounted on glass slides using ProLong antifade solution (Molecular Probes).

Retinal neurons were grown for 36-48 hours after plating and then stimulated for 30 minutes with 2  $\mu\text{g/ml}$  preclustered ephrin-A5 Fc or Fc. The cultures were then fixed by adding prewarmed fixative containing 8% paraformaldehyde and 8% sucrose directly into the same volume of culture medium. The cultures were left in fixative for 12 hours, washed in PBS, and mounted in Fluoromount. In some cases, the cultures were immunostained with the Tuj1 antibody against beta-III-tubulin to label neurons. Collapsed growth cones were recognized by the absence of lamellipodia and the collapsed appearance of their distal tip.

### Immunoprecipitation and immunoblotting

Transiently transfected cells were lysed in radioimmunoprecipitation (RIPA) buffer containing 10  $\mu\text{M}$  NaF, 1  $\mu\text{M}$  sodium pervanadate and protease inhibitors. For immunoprecipitations, cell lysates were incubated with 4  $\mu\text{g}$  anti-Crk antibody, 5  $\mu\text{g}$  anti-EphA2 monoclonal antibody or 5  $\mu\text{g}$  anti-EphB2 antibody immobilized on GammaBind Plus Sepharose beads (Amersham Biosciences) or 15  $\mu\text{l}$  anti-phosphotyrosine antibody conjugated to agarose.

Primary cultures of rat hippocampal neurons and brain regions prepared from 10-day old C57/Bl6 mice were lysed in 50 mM Tris pH 7.4, 150 mM NaCl, 1% NP-40, 0.25% sodium deoxycholate, 1 mM EDTA, 10  $\mu\text{M}$  sodium vanadate, 10  $\mu\text{M}$  NaF and protease inhibitors and cleared by centrifugation. Protein concentrations were determined using a BioRad DC protein assay.

Immunoprecipitates and lysates were separated by SDS-PAGE and probed by immunoblotting with primary and secondary antibodies. Detection of horseradish peroxidase-conjugated secondary antibodies was performed with enhanced chemiluminescence detection systems from Amersham Biosciences or Pierce. After an initial immunoblot, filters were stripped and then reprobed with different antibodies.

### R-Ras activity assays

To measure levels of GTP-bound activated R-Ras, COS cells stably expressing R-Ras were stimulated with 1  $\mu\text{g/ml}$  ephrin-A1 Fc, 1  $\mu\text{g/ml}$  ephrin-B1 Fc or 0.5  $\mu\text{g/ml}$  Fc, washed twice with cold Tris-buffered saline, lysed in 50 mM Tris pH 7.5, 1% Triton X-100, 150 mM NaCl, 20 mM  $\text{MgCl}_2$ , 10% glycerol, 5 mM dithiothreitol and protease inhibitors, and incubated for 40 minutes with GST-Raf1 Ras-binding domain (RBD) immobilized on glutathione beads (de Rooij and Bos, 1997). Samples were separated by SDS-PAGE and probed with anti-R-Ras antibodies.

### Cell migration

Transiently transfected COS cells (75,000 cells/well) were seeded in 0.5% FBS on Transwell<sup>®</sup> filters (Corning Inc.) that had been coated on the bottom with 10  $\mu\text{g/ml}$  fibronectin and blocked with 1% BSA. The cells were allowed to migrate towards the fibronectin and either 1  $\mu\text{g/ml}$  ephrin-B1 Fc or 0.5  $\mu\text{g/ml}$  Fc in 0.5% FBS for 3 hours. After migration, cells on the upper side of the filters were removed and the filters were fixed in 4% formaldehyde, permeabilized in 0.1% Triton X-100 in PBS, stained with DAPI and mounted on glass slides. Transfected cells (positive for EGFP and DAPI) that had migrated to the bottom side of the filters were placed under a fluorescence microscope and counted in five microscope fields/well at 60 $\times$  magnification. We calculated the number of transfected cells that migrated to the bottom side of the filter in 3 hours based on the area of the five microscopic fields (0.15  $\text{mm}^2$ ) and the area of the filter (38  $\text{mm}^2$ ). Untransfected cells (positive only for DAPI) were also counted separately as a control (not shown). Transfection efficiencies were approximately 20-30% and were verified from separate aliquots of transfected cells that were plated on glass coverslips. Lysates from the transfected cells were also probed by immunoblotting to verify expression of the transfected proteins (not shown).

We thank Fatima Valencia and Jaime Seddon for excellent technical assistance; Nicole Noren for help and advice; Masanobu Komatsu and Erkki Ruoslahti for R-Ras knockout sample tissue; and Kristiina Vuori for the Crk221F construct. This work was supported by NIH grants HD025938 and CA102583 to E.B.P. and Deutsche Forschungsgemeinschaft postdoctoral fellowship RI1208/1 to M.R.

### References

- Abassi, Y. A. and Vuori, K. (2002). Tyrosine 221 in Crk regulates adhesion-dependent membrane localization of Crk and Rac and activation of Rac signaling. *EMBO J.* **21**, 4571-4582.
- Battle, E., Henderson, J. T., Begthel, H., van den Born, M. M., Sancho, E., Huls, G., Meeldijk, J., Robertson, J., van de Wetering, M., Pawson, T. et al. (2002). Beta-catenin and TCF mediate cell positioning in the intestinal epithelium by controlling the expression of EphB/EphrinB. *Cell* **111**, 251-263.
- Battle, E., Bacani, J., Begthel, H., Jonkeer, S., Gregorieff, A., van de Born, M., Malats, N., Sancho, E., Boon, E., Pawson, T. et al. (2005). EphB receptor activity suppresses colorectal cancer progression. *Nature* **435**, 1126-1130.
- Bazzoni, G., Shih, D. T., Buck, C. A. and Hemler, M. E. (1995). Monoclonal antibody 9EG7 defines a novel beta 1 integrin epitope induced by soluble ligand and manganese, but inhibited by calcium. *J. Biol. Chem.* **270**, 25570-25577.
- Brantley-Sieders, D., Parker, M. and Chen, J. (2004). Eph receptor tyrosine kinases in tumor and tumor microenvironment. *Curr. Pharm. Des.* **10**, 3431-3442.
- BurrIDGE, K. and Wennerberg, K. (2004). Rho and Rac take center stage. *Cell* **116**, 167-179.
- Chaves-Olarte, E., Freer, E., Parra, A., Guzman-Verri, C., Moreno, E. and Thelestam, M. (2003). R-Ras glucosylation and transient RhoA activation determine the cytopathic effect produced by toxin B variants from toxin A-negative strains of *Clostridium difficile*. *J. Biol. Chem.* **278**, 7956-7963.
- Cowan, C. W., Shao, Y. R., Sahin, M., Shamah, S. M., Lin, M. Z., Greer, P. L., Gao, S., Griffith, E. C., Brugge, J. S. and Greenberg, M. E. (2005). Vav family GEFs link activated Ephs to endocytosis and axon guidance. *Neuron* **46**, 205-217.
- Cox, A. D., Brtva, T. R., Lowe, D. G. and Der, C. J. (1994). R-Ras induces malignant, but not morphologic, transformation of NIH3T3 cells. *Oncogene* **9**, 3281-3288.
- de Rooij, J. and Bos, J. L. (1997). Minimal Ras-binding domain of Raf1 can be used as an activation-specific probe for Ras. *Oncogene* **14**, 623-625.
- Dodelet, V. C., Pazzagli, C., Zisch, A. H., Hauser, C. A. and Pasquale, E. B. (1999). A novel signaling intermediate, SHEP1, directly couples Eph receptors to R-Ras and Rap1A. *J. Biol. Chem.* **274**, 31941-31946.
- Drescher, U., Kremoser, C., Handwerker, C., Loschinger, R., Noda, M. and Bonhoeffer, F. (1995). In vitro guidance of retinal ganglion cell axons by RAGS, a 25 kDa tectal protein related to ligands for Eph receptor tyrosine kinases. *Cell* **82**, 359-370.
- Ekman, S., Thuresson, E. R., Heldin, C. H. and Ronnstrand, L. (1999). Increased mitogenicity of an alphabeta heterodimeric PDGF receptor complex correlates with lack of RasGAP binding. *Oncogene* **18**, 2481-2488.
- Elowe, S., Holland, S. J., Kulkarni, S. and Pawson, T. (2001). Downregulation of the ras-mitogen-activated protein kinase pathway by the EphB2 receptor tyrosine kinase is required for ephrin-induced neurite retraction. *Mol. Cell. Biol.* **21**, 7429-7441.
- Felekis, K. N., Narsimhan, R. P., Near, R., Castro, A. F., Zheng, Y., Quilliam, L. A. and Lerner, A. (2005). AND-34 activates phosphatidylinositol 3-kinase and induces anti-estrogen resistance in a SH2 and GDP exchange factor-like domain-dependent manner. *Mol. Cancer Res.* **3**, 32-41.
- Feller, S. M., Knudsen, B. and Hanafusa, H. (1994). c-Abl kinase regulates the protein binding activity of p-Crk. *EMBO J.* **13**, 2341-2351.
- Furuhjelm, J. and Peranen, J. (2003). The C-terminal end of R-Ras contains a focal adhesion targeting signal. *J. Cell Sci.* **116**, 3729-3738.
- Gotoh, T., Niino, Y., Tokuda, M., Hatase, O., Nakamura, S., Matsuda, M. and Hattori, S. (1997). Activation of R-Ras by Ras-guanine nucleotide-releasing factor. *J. Biol. Chem.* **272**, 18602-18607.
- Hansen, M., Rusyn, E. V., Hughes, P. E., Ginsberg, M. H., Cox, A. D. and Willumsen, B. M. (2002). R-Ras C-terminal sequences are sufficient to confer R-Ras specificity to H-Ras. *Oncogene* **21**, 4448-4461.
- Hock, B., Bohme, B., Karn, T., Feller, S., Rubsamens-Waigmann, H. and Strebhardt, K. (1998). Tyrosine-614, the major autophosphorylation site of the receptor tyrosine kinase HEK2, functions as multi-docking site for SH2-domain mediated interactions. *Oncogene* **17**, 255-260.
- Holash, J. A. and Pasquale, E. B. (1995). Polarized expression of the receptor protein tyrosine kinase Cdk5 in the developing avian visual system. *Dev. Biol.* **172**, 683-693.
- Holland, S. J., Gale, N. W., Gish, G. D., Roth, R. A., Songyang, Z., Cantley, L. C., Henkemeyer, M., Yancopoulos, G. D. and Pawson, T. (1997). Juxtamembrane tyrosine residues couple the Eph family receptor EphB2/Nuk to specific SH2 domain proteins in neuronal cells. *EMBO J.* **16**, 3877-3888.
- Holly, S. P., Larson, M. K. and Parise, L. V. (2005). The unique N-terminus of R-ras is required for Rac activation and precise regulation of cell migration. *Mol. Biol. Cell* **16**, 2458-2469.
- Hughes, P. E., Oertli, B., Han, J. and Ginsberg, M. H. (2001). R-Ras regulation of integrin function. *Methods Enzymol.* **333**, 163-171.
- Huusko, P., Ponciano-Jackson, D., Wolf, M., Kiefer, J. A., Azorsa, D. O., Tuzmen, S., Weaver, D., Robbins, C., Moses, T., Allinen, M. et al. (2004). Nonsense-mediated decay microarray analysis identifies mutations of EPHB2 in human prostate cancer. *Nat. Genet.* **36**, 979-983.
- Ichiba, T., Kuraishi, Y., Sakai, O., Nagata, S., Groffen, J., Kurata, T., Hattori, S. and Matsuda, M. (1997). Enhancement of guanine-nucleotide exchange activity of C3G for Rap1 by the expression of Crk, CrkL, and Grb2. *J. Biol. Chem.* **272**, 22215-22220.
- Ivins, J. K., Yurchenco, P. D. and Lander, A. D. (2000). Regulation of neurite outgrowth by integrin activation. *J. Neurosci.* **20**, 6551-6560.
- Jeong, H. W., Nam, J. O. and Kim, I. S. (2005). The COOH-terminal end of R-Ras alters the motility and morphology of breast epithelial cells through Rho/Rho-kinase. *Cancer Res.* **65**, 507-515.

- Kaibuchi, K., Kuroda, S. and Amano, M.** (1999). Regulation of the cytoskeleton and cell adhesion by the Rho family GTPases in mammalian cells. *Annu. Rev. Biochem.* **68**, 459-486.
- Keely, P. J., Rusyn, E. V., Cox, A. D. and Parise, L. V.** (1999). R-Ras signals through specific integrin alpha cytoplasmic domains to promote migration and invasion of breast epithelial cells. *J. Cell Biol.* **145**, 1077-1088.
- Kinashi, T., Katagiri, K., Watanabe, S., Vanhaesebroeck, B., Downward, J. and Takatsu, K.** (2000). Distinct mechanisms of alpha 5beta 1 integrin activation by Ha-Ras and R-Ras. *J. Biol. Chem.* **275**, 22590-22596.
- Kinbara, K., Goldfinger, L. E., Hansen, M., Chou, F. L. and Ginsberg, M. H.** (2003). Ras GTPases: integrins' friends or foes? *Nat. Rev. Mol. Cell. Biol.* **4**, 767-776.
- Komatsu, M. and Ruoslahti, E.** (2005). R-Ras is a global regulator of vascular regeneration that suppresses intimal hyperplasia and tumor angiogenesis. *Nat. Med.* **11**, 1346-1350.
- Koolpe, M., Dail, M. and Pasquale, E. B.** (2002). An ephrin mimetic peptide that selectively targets the EphA2 receptor. *J. Biol. Chem.* **277**, 46974-46979.
- Koolpe, M., Burgess, R., Dail, M. and Pasquale, E. B.** (2005). EphB receptor-binding peptides identified by phage display enable design of an antagonist with ephrin-like affinity. *J. Biol. Chem.* **280**, 17301-17311.
- Kwong, L., Wozniak, M. A., Collins, A. S., Wilson, S. D. and Keely, P. J.** (2003). R-Ras promotes focal adhesion formation through focal adhesion kinase and p130(Cas) by a novel mechanism that differs from integrins. *Mol. Cell. Biol.* **23**, 933-949.
- Lawrenson, I. D., Wimmer-Kleikamp, S. H., Lock, P., Schoenwaelder, S. M., Down, M., Boyd, A. W., Alewood, P. F. and Lackmann, M.** (2002). Ephrin-A5 induces rounding, blebbing and de-adhesion of EphA3-expressing 293T and melanoma cells by CrkII and Rho-mediated signalling. *J. Cell Sci.* **115**, 1059-1072.
- Li, S., Nakamura, S. and Hattori, S.** (1997). Activation of R-Ras GTPase by GTPase-activating proteins for Ras, Gap1(m), and p120GAP. *J. Biol. Chem.* **272**, 19328-19332.
- Murai, K. K. and Pasquale, E. B.** (2005). New exchanges in Eph-dependent growth cone dynamics. *Neuron* **46**, 161-163.
- Murai, K. K., Nguyen, L. N., Irie, F., Yamaguchi, Y. and Pasquale, E. B.** (2003). Control of hippocampal dendritic spine morphology through ephrin-A3/EphA4 signaling. *Nat. Neurosci.* **6**, 153-160.
- Nagashima, K., Endo, A., Ogita, H., Kawana, A., Yamagishi, A., Kitabatake, A., Matsuda, M. and Mochizuki, N.** (2002). Adaptor protein Crk is required for ephrin-B1-induced membrane ruffling and focal complex assembly of human aortic endothelial cells. *Mol. Biol. Cell* **13**, 4231-4242.
- Nishigaki, M., Aoyagi, K., Danjoh, I., Fukaya, M., Yanagihara, K., Sakamoto, H., Yoshida, T. and Sasaki, H.** (2005). Discovery of aberrant expression of R-RAS by cancer-linked DNA hypomethylation in gastric cancer using microarrays. *Cancer Res.* **65**, 2115-2124.
- Nobes, C. D. and Hall, A.** (1995). Rho, rac, and cdc42 GTPases regulate the assembly of multimolecular focal complexes associated with actin stress fibers, lamellipodia, and filopodia. *Cell* **81**, 53-62.
- Noren, N. K. and Pasquale, E. B.** (2004). Eph receptor-ephrin bidirectional signals that target Ras and Rho proteins. *Cell Signal.* **16**, 655-666.
- Oertli, B., Han, J., Marte, B. M., Sethi, T., Downward, J., Ginsberg, M. and Hughes, P. E.** (2000). The effector loop and prenylation site of R-Ras are involved in the regulation of integrin function. *Oncogene* **19**, 4961-4969.
- Ogita, H., Kunimoto, S., Kamioka, Y., Sawa, H., Masuda, M. and Mochizuki, N.** (2003). EphA4-mediated Rho activation via Vsm-RhoGEF expressed specifically in vascular smooth muscle cells. *Circ. Res.* **93**, 23-31.
- Ohba, Y., Mochizuki, N., Yamashita, S., Chan, A. M., Schrader, J. W., Hattori, S., Nagashima, K. and Matsuda, M.** (2000). Regulatory proteins of R-Ras, TC21/R-Ras2, and M-Ras/R-Ras3. *J. Biol. Chem.* **275**, 20020-20026.
- Oinuma, I., Ishikawa, Y., Katoh, H. and Negishi, M.** (2004a). The semaphorin 4D receptor Plexin-B1 is a GTPase activating protein for R-Ras. *Science* **305**, 862-865.
- Oinuma, I., Katoh, H. and Negishi, M.** (2004b). Molecular dissection of the semaphorin 4D receptor plexin-B1-stimulated R-Ras GTPase-activating protein activity and neurite remodeling in hippocampal neurons. *J. Neurosci.* **24**, 11473-11480.
- Osada, M., Tolkacheva, T., Li, W., Chan, T. O., Tschlis, P. N., Saez, R., Kimmelman, A. C. and Chan, A. M.** (1999). Differential roles of Akt, Rac, and Ral in R-Ras-mediated cellular transformation, adhesion, and survival. *Mol. Cell. Biol.* **19**, 6333-6344.
- Palmer, A. and Klein, R.** (2003). Multiple roles of ephrins in morphogenesis, neuronal networking, and brain function. *Genes Dev.* **17**, 1429-1450.
- Pasquale, E. B.** (2004). Eph-ephrin promiscuity is now crystal clear. *Nat. Neurosci.* **7**, 417-418.
- Pasquale, E. B.** (2005). Eph receptor signalling casts a wide net on cell behaviour. *Nat. Rev. Mol. Cell. Biol.* **6**, 462-475.
- Pasterkamp, R. J.** (2005). R-Ras fills another GAP in semaphorin signalling. *Trends Cell Biol.* **15**, 61-64.
- Poliakov, A., Cotrina, M. and Wilkinson, D. G.** (2004). Diverse roles of Eph receptors and ephrins in the regulation of cell migration and tissue assembly. *Dev. Cell* **7**, 465-480.
- Ridley, A. J. and Hall, A.** (1992). The small GTP-binding protein rho regulates the assembly of focal adhesions and actin stress fibers in response to growth factors. *Cell* **70**, 389-399.
- Riedl, J. A., Brandt, D. T., Batlle, E., Price, L. S., Clevers, H. and Bos, J. L.** (2005). Downregulation of Rap1 activity is involved in ephrinB1-induced cell contraction. *Biochem. J.* **389**, 465-469.
- Rincon-Arango, H., Rosales, R., Mora, N., Rodriguez-Castaneda, A. and Rosales, C.** (2003). R-Ras promotes tumor growth of cervical epithelial cells. *Cancer* **97**, 575-585.
- Rohm, B., Rahim, B., Kleiber, B., Hovatta, I. and Puschel, A. W.** (2000). The semaphorin 3A receptor may directly regulate the activity of small GTPases. *FEBS Lett.* **486**, 68-72.
- Saez, R., Chan, A. M., Miki, T. and Aaronson, S. A.** (1994). Oncogenic activation of human R-ras by point mutations analogous to those of prototype H-ras oncogenes. *Oncogene* **9**, 2977-2982.
- Sahin, M., Greer, P. L., Lin, M. Z., Poucher, H., Eberhart, J., Schmidt, S., Wright, T. M., Shamah, S. M., O'Connell, S., Cowan, C. W. et al.** (2005). Eph-dependent tyrosine phosphorylation of ephexin1 modulates growth cone collapse. *Neuron* **46**, 191-204.
- Sasaki, Y., Cheng, C., Uchida, Y., Nakajima, O., Ohshima, T., Yagi, T., Taniguchi, M., Nakayama, T., Kishida, R., Kudo, Y. et al.** (2002). Fyn and Cdk5 mediate semaphorin-3A signaling, which is involved in regulation of dendrite orientation in cerebral cortex. *Neuron* **35**, 907-920.
- Self, A. J., Caron, E., Paterson, H. F. and Hall, A.** (2001). Analysis of R-Ras signalling pathways. *J. Cell Sci.* **114**, 1357-1366.
- Sethi, T., Ginsberg, M. H., Downward, J. and Hughes, P. E.** (1999). The small GTP-binding protein R-Ras can influence integrin activation by antagonizing a Ras/Raf-initiated integrin suppression pathway. *Mol. Biol. Cell* **10**, 1799-1809.
- Shamah, S. M., Lin, M. Z., Goldberg, J. L., Estrach, S., Sahin, M., Hu, L., Bazalakova, M., Neve, R. L., Corfas, G., Debant, A. et al.** (2001). EphA receptors regulate growth cone dynamics through the novel guanine nucleotide exchange factor ephexin. *Cell* **105**, 233-244.
- Smith, L. M., Walsh, P. T., Rudiger, T., Cotter, T. G., Mc, Carthy, T. V., Marx, A. and O'Connor, R.** (2004). EphA3 is induced by CD28 and IGF-1 and regulates cell adhesion. *Exp. Cell Res.* **292**, 295-303.
- Takahashi, T., Fournier, A., Nakamura, F., Wang, L. H., Murakami, Y., Kalb, R. G., Fujisawa, H. and Strittmatter, S. M.** (1999). Plexin-neuropilin-1 complexes form functional semaphorin-3A receptors. *Cell* **99**, 59-69.
- Tanaka, M., Kamo, T., Ota, S. and Sugimura, H.** (2003). Association of Dishevelled with Eph tyrosine kinase receptor and ephrin mediates cell repulsion. *EMBO J.* **22**, 847-858.
- Tong, J., Elowe, S., Nash, P. and Pawson, T.** (2003). Manipulation of EphB2 regulatory motifs and SH2 binding sites switches MAPK signaling and biological activity. *J. Biol. Chem.* **278**, 6111-6119.
- Twigg, S. R., Kan, R., Babbs, C., Bochukova, E. G., Robertson, S. P., Wall, S. A., Morris-Kay, G. M. and Wilkie, A. O.** (1999). Mutations of ephrin-B1 (EFNB1), a marker of tissue boundary formation, cause craniofrontonasal syndrome. *Proc. Natl. Acad. Sci. USA* **101**, 8652-8657.
- Wahl, S., Barth, H., Ciossek, T., Aktories, K. and Mueller, B. K.** (2000). Ephrin-A5 induces collapse of growth cones by activating Rho and Rho kinase. *J. Cell Biol.* **149**, 263-270.
- Wieland, L., Jakubiczka, S., Muschke, P., Cohen, M., Thiele, H., Gerlach, K. L., Adams, R. H. and Wieacker, P.** (2004). Mutations of the ephrin-B1 gene cause craniofrontonasal syndrome. *Am. J. Hum. Genet.* **74**, 1209-1215.
- Wozniak, M. A., Kwong, L., Chodniewicz, D., Klemke, R. L. and Keely, P. J.** (2005). R-Ras controls membrane protrusion and cell migration through the spatial regulation of Rac and Rho. *Mol. Biol. Cell* **16**, 84-96.
- Yamamoto, T., Matsui, T., Nakafuku, M., Iwamatsu, A. and Kaibuchi, K.** (1995). A novel GTPase-activating protein for R-Ras. *J. Biol. Chem.* **270**, 30557-30561.
- Zhang, Z., Vuori, K., Wang, H., Reed, J. C. and Ruoslahti, E.** (1996). Integrin activation by R-ras. *Cell* **85**, 61-69.
- Zisch, A. H., Kalo, M. S., Chong, L. D. and Pasquale, E. B.** (1998). Complex formation between EphB2 and Src requires phosphorylation of tyrosine 611 in the EphB2 juxtamembrane region. *Oncogene* **16**, 2657-2670.
- Zou, J. X., Wang, B., Kalo, M. S., Zisch, A. H., Pasquale, E. B. and Ruoslahti, E.** (1999). An Eph receptor regulates integrin activity through R-Ras. *Proc. Natl. Acad. Sci. USA* **96**, 13813-13818.
- Zou, J. X., Liu, Y., Pasquale, E. B. and Ruoslahti, E.** (2002). Activated Src oncogene phosphorylates R-Ras and suppresses integrin activity. *J. Biol. Chem.* **277**, 1824-1827.
